## Novavax NVX-COV2373 triggers potent neutralization of Omicron sub-lineages

Jinal N. Bhiman<sup>1,2</sup>, Simone I. Richardson<sup>1,2</sup>, Bronwen E. Lambson<sup>1,2</sup>, Prudence Kgagudi<sup>1,2</sup>, Nonkululeko Mzindle<sup>1,2</sup>, Haajira Kaldine<sup>1,2</sup>, Carol Crowther<sup>1,2</sup>, Glenda Gray<sup>3</sup>, Linda-Gail Bekker<sup>4,5</sup>, Novavax trial clinical lead author group\*, Vivek Shinde<sup>6</sup>, Chijioke Bennett<sup>6</sup>, Gregory M. Glenn<sup>6</sup>, Shabir Madhi<sup>7#</sup>, Penny L. Moore<sup>1,2,4,8, #</sup>

\* Novavax trial clinical lead author group\* - Anthonet Koen<sup>9</sup>, Lee Fairlie<sup>10</sup>, Leon Fouche<sup>11</sup>, Qasim Bhorat<sup>12</sup>, Keertan Dheda<sup>13,14</sup>, Michele Tameris<sup>15</sup>, Mduduzi Masilela<sup>16</sup>, , Zaheer Hoosain<sup>17</sup>, Nishanta Singh<sup>18</sup>, Sherika Hanley<sup>8</sup>, Moherndran Archary<sup>19</sup>, Cheryl Louw<sup>20</sup>, Coert Grobbelaar<sup>21</sup>, Umesh Laloo<sup>22</sup>, Natasha Joseph<sup>23</sup>, Gertruida Kruger<sup>24</sup>

### Affiliations

<sup>1</sup>National Institute for Communicable Diseases of the National Health Laboratory Services, Johannesburg, South Africa

<sup>2</sup>MRC Antibody Immunity Research Unit, School of Pathology, University of the Witwatersrand, Johannesburg, South Africa

<sup>3</sup>The South African Medical Research Council, Tygerberg, South Africa

<sup>4</sup>Institute of Infectious Disease and Molecular Medicine, University of Cape Town, Cape Town, South Africa

<sup>5</sup>The Desmond Tutu HIV Centre, University of Cape Town, Cape Town, South Africa

<sup>6</sup>Novavax, Inc, Gaithersburg, Maryland, United States

<sup>7</sup>South African Medical Research Council Vaccines and Infectious Diseases Analytics Research Unit, Faculty of Health Sciences, University of the Witwatersrand, Johannesburg, South Africa

<sup>8</sup>Centre for the AIDS Programme of Research in South Africa, University of Kwazulu-Natal, Durban, South Africa

<sup>9</sup>Wits Vaccines and Infectious Diseases Analytics (VIDA) Research Unit

<sup>10</sup>Wits RHI, Faculty of Health Sciences, University of the Witwatersrand, Johannesburg, South Africa.

<sup>11</sup>Limpopo Clinical Research Initiative

<sup>12</sup>Soweto Clinical Trials Centre (SCTC)

<sup>13</sup>Centre for Lung Infection and Immunity, Division of Pulmonology, Department of Medicine and UCT Lung Institute & South African MRC/UCT Centre for the Study of Antimicrobial Resistance, University of Cape Town, Cape Town, South Africa.

<sup>14</sup>Faculty of Infectious and Tropical Diseases, Department of Immunology and Infection, London School of Hygiene and Tropical Medicine, London, UK

<sup>15</sup>South African Tuberculosis Vaccine Initiative (SATVI), Department of Pathology, Institute of Infectious Disease and Molecular Medicine and Division of Immunology, Faculty of Health Sciences, University of Cape Town, Observatory, Cape Town

<sup>16</sup>Setshaba Research Centre (SRC)

<sup>17</sup>Joshua Research

<sup>18</sup>Verulam and Isipingo Clinical Research Site, South African Medical Research Council, HIV and other Infectious Diseases Research Unit (HIDRU)

<sup>19</sup>Durban International Clinical Research Site, Enhancing Care Foundation

<sup>20</sup>Madibeng Centre for Research

<sup>21</sup>The Aurum Institute; Pretoria Clinical Research Centre

<sup>22</sup>KwaPhila Health Solution

<sup>23</sup>Peermed CTC (PTY) - MERC Kempton

<sup>24</sup>Mzansi Ethical Research Centre Middleburg

# Corresponding authors: email - [Shabir.Madhi@wits.ac.za](mailto:Shabir.Madhi@wits.ac.za), [pennym@nicd.ac.za](mailto:pennym@nicd.ac.za)

Abstract: 144 words

Main text: 675 words (excluding funding statement, acknowledgments, methods and references)

## **Abstract**

The SARS-CoV-2 Omicron (B.1.1.529) Variant of Concern (VOC) and its sub-lineages (including BA.2, BA.4/5, BA.2.12.1) contain spike mutations that confer high level resistance to neutralizing antibodies. The NVX-CoV2373 vaccine, a protein nanoparticle vaccine, has value in countries with constrained cold-chain requirements. Here we report neutralizing titers following two or three doses of NVX-CoV2373. We show that after two doses, Omicron sub-lineages BA.1 and BA.4 were resistant to neutralization by 72% (21/29) and 59% (17/29) of samples. However, after a third dose of NVX-CoV2373, we observed high titers against Omicron BA.1 (GMT: 1,197) and BA.4 (GMT: 582), with responses similar in magnitude to those triggered by three doses of an mRNA vaccine. These data are of particular relevance as BA.4 is emerging to become the dominant strain in many locations, and highlight the potential utility of the NVX-CoV2373 vaccine as a booster in resource-limited environments.

## 1 Main text

2 The SARS-CoV-2 Omicron (B.1.1.529) Variant of Concern (VOC)<sup>1</sup> and its sub-  
3 lineages<sup>2</sup> (including BA.2, BA.4, BA.5, BA.2.12.1) contain changes to the spike driven  
4 by immune escape, and are relatively immune evasive compared with ancestral-like  
5 virus to neutralizing antibodies elicited by coronavirus disease 2019 (COVID-19)  
6 vaccines<sup>3,4</sup>. Similarly, individuals infected with SARS-CoV-2 exhibit reduced  
7 neutralizing titers against multiple Omicron sub-lineages<sup>3</sup>. Neutralization escape by  
8 the Omicron VOC has also been observed following vaccination, regardless of the  
9 vaccine type and platform<sup>3-8</sup>, including with two doses of the NVX-CoV2373 vaccine<sup>9</sup>.  
10 However, booster doses, especially using mRNA vaccines, enhance neutralization  
11 capacity against Omicron<sup>4,7</sup>. The NVX-CoV2373 vaccine, which was tested in two  
12 phase 3 trials in the US, UK and Mexico demonstrated 90% efficacy against  
13 symptomatic and 100% efficacy against severe COVID-19<sup>10,11</sup>. A Phase 2b trial in  
14 South Africa in 2020-2021 demonstrated 48% efficacy against symptomatic infection  
15 COVID-19, likely due to relatively antibody-evasive neutralization resistant Beta  
16 variant, despite 100% efficacy against severe disease<sup>12</sup>. The vaccine has received  
17 authorization for use by the European Medicines Agency and is listed on the World  
18 Health Organization's emergency use listing for COVID-19 vaccines<sup>12-14</sup>. This protein-  
19 based vaccine is appealing in low-and middle-income countries (LMICs) because of  
20 its stability and reduced cold chain requirements. Here, we investigated the effect of a  
21 third dose on the neutralizing capacity of NVX-CoV2373 vaccinee sera.

22  
23 We tested neutralization of the ancestral D614G, Beta, Omicron BA.1 and Omicron  
24 BA.4/BA.5 by NVX-CoV2373 vaccinee sera following a 2 dose (n = 29) and 3 dose (n  
25 = 48) regimen. Fourteen days after two doses of NVX-CoV2373, geometric mean titers  
26 (GMT) were highest against the D614G variant (GMT: 1,401), with reductions in GMT  
27 to 173 (8.1-fold reduction), 34 (41-fold reduction) and 47 (30-fold reduction) against  
28 Beta, Omicron BA.1 and Omicron BA.4/BA.5 respectively. The Omicron sub-lineages  
29 BA.1 and BA.4/BA.5 were resistant to neutralization, with titers less than limit of  
30 detection of the assay, by 72% (21/29) and 59% (17/29) of samples after the 2<sup>nd</sup> dose  
31 of vaccine (**Fig 1**, grey).

32  
33 At one month after the third dose of the NVX-CoV2372 vaccine, neutralizing antibody  
34 activity with titers above 1:200 were evident against the Beta and Omicron BA.1  
35 variants in all but one sample (n=47/48). The neutralizing antibody titers against the  
36 D614G variant were boosted to GMT of 10,862. Furthermore, we observed a  
37 significant 10-,35- and 12-fold increase in titers against Beta (GMT: 1,733), Omicron  
38 BA.1 (GMT: 1,197) and Omicron BA.4/BA.5 (GMT: 582) respectively (**Fig 1**, teal),  
39 though titers were 6- to 18-fold lower than those against D614G. Convalescent plasma  
40 titers (**Supp Fig 1**) were used to relate Omicron sub-lineage titres to 50% protection  
41 levels as described by Khoury et al<sup>15</sup>, and showed that after three doses of NVX-  
42 CoV2373, all but one sample exceeded this threshold.

43  
44

45

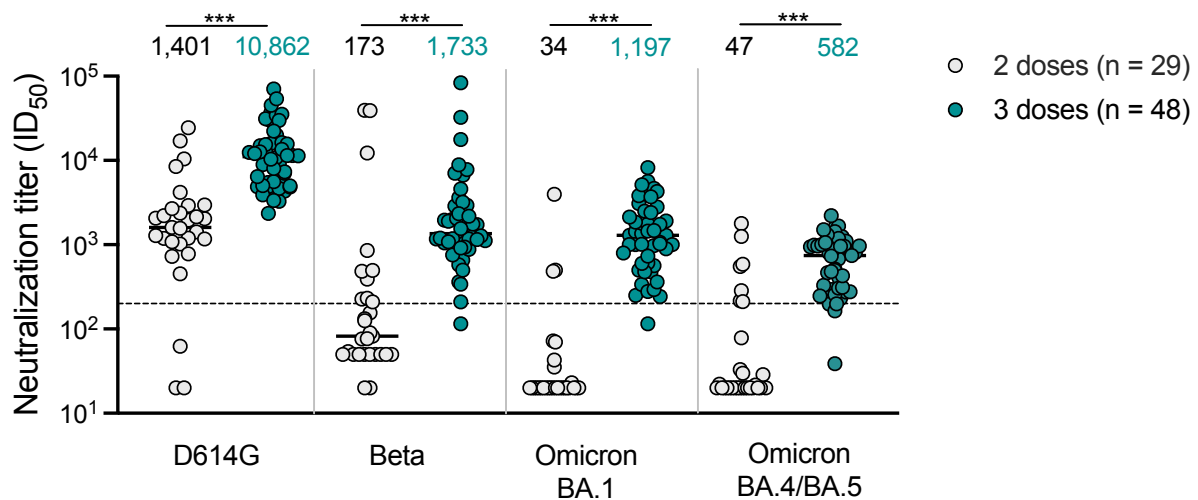

46

47

48

49

50

51

52

53

54

55

56

57

58

59

60

61

62

63

64

65

66

67

68

69

70

71

72

73

74

75

**Figure 1. Neutralization of SARS-CoV-2 variants by NVX-CoV2373 vaccinee plasma.** Neutralization of ancestral D164G, Beta, Omicron BA.1 and Omicron BA.4/BA.5 pseudoviruses by NVX-CoV2373 vaccinee plasma following 2 (grey) or 3 (teal) doses. Geometric mean titers (GMT) for each virus are shown above the individual points, and percent of specimens where no neutralization was observed (red) is indicated in the pie charts. Number of vaccinee specimens tested are indicated and p values were calculated using the Mann-Whitney t-test for non-parametric data with  $p < 0,001$  for D614G, Beta, Omicron BA.1 and Omicron BA.4/BA.5. Dashed line indicates the neutralization level at 20.2% of the mean convalescent level ( $ID_{50} = 200$ ), which provides an estimated 50% protection against detectable SARS-CoV-2 infection per the analysis by Khoury *et al*<sup>15</sup>. Samples were used at a starting dilution of 1 in 20 (limit of detection) with a seven 3-fold dilutions to create a titration series.

We next compared neutralization of Omicron BA.1 and BA.4/BA.5 following multi-dose regimens of adenoviral, mRNA and protein-based vaccines. As expected, 2 doses of AD26.COVS elicited 10- and 14-fold lower GMT against BA.1 than 3 doses of the BNT162b2 and NVX-CoV2373 vaccines respectively (**Fig 2**). Similarly the AD26.COVS vaccine elicited 12- and 11-fold lower GMT against BA.4/BA.5 than 3 doses of either the BNT162b2 and NVX-CoV2373 vaccines. Most third dose BNT162b2 and NVX-CoV2373 plasma were able to neutralize Omicron BA.1 and BA.4/BA.5 at titers greater than 200, while only 13-38% of the AD26.COVS samples achieved these titers. Given the lower GMT for all three boosted vaccine regimens against BA.4/BA.5, it was unsurprising that 91% (44/48) NVX-CoV2373 and 83% (10/12) BNT162b2 samples, compared to 13% (1/8) AD26.COVS samples neutralized at titres above 1 in 200 threshold. The NVX-CoV2373 third dose plasma GMT against BA.1 and BA.4/BA.5 was comparable to BNT162b2, with the BA.1 data trending higher for NVX-COV2373.

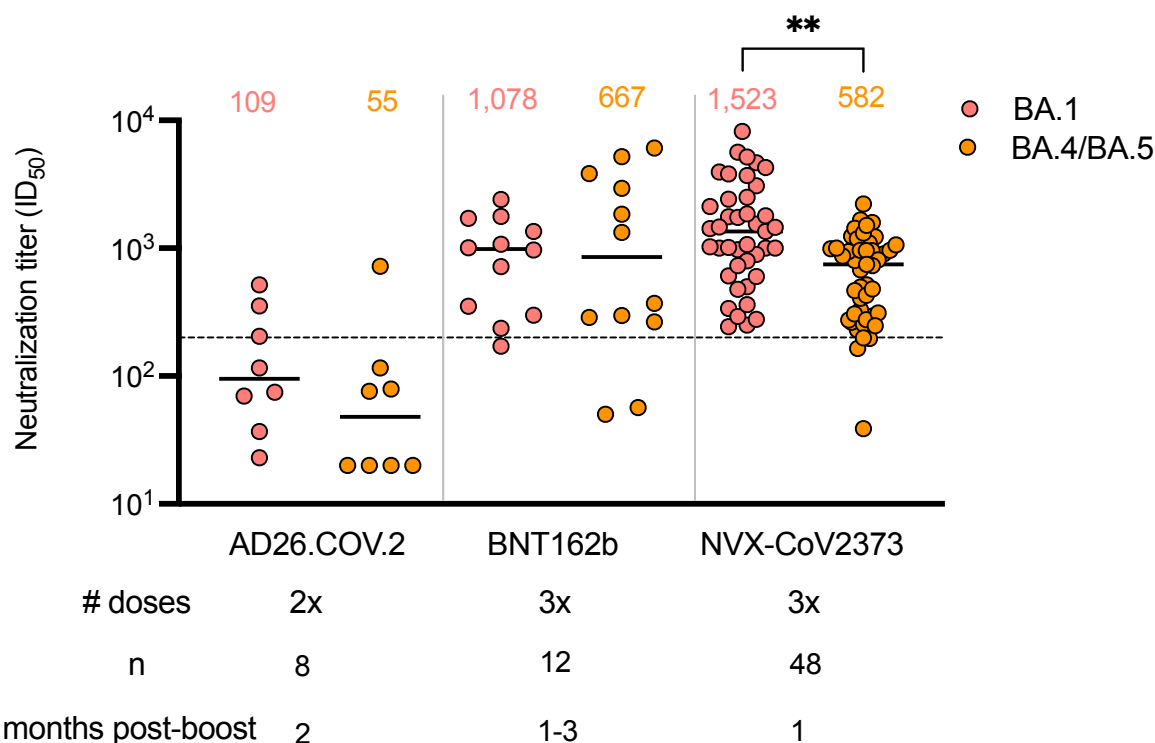

76

77

78 **Figure 2. Neutralization of Omicron BA.1 and BA.4/BA.5 by boosted vaccinee**  
 79 **plasma.** Neutralization of Omicron BA.1 and BA.4/BA.5 by vaccinee plasma following  
 80 2 doses of the AD26.CO.V.2S or 3 doses of the BNT162b2 or NVX-CoV2373 vaccines.  
 81 Number of doses, number of samples and date of sample collection after boost for  
 82 each group are indicated. Geometric mean titers (GMT) for each virus are shown  
 83 above the individual points, P values were calculated using two-way ANOVA with  $p <$   
 84  $0,001$  for AD26CoV2.S versus NXV-CoV2373 and  $p = 0,0011$  for NVX-CoV2373 BA.1  
 85 versus BA.4/BA.5). Dashed line indicates the neutralization level at 20,2% of the mean  
 86 convalescent level ( $ID_{50} = 200$ ), which provides an estimated 50% protection against  
 87 detectable SARS-CoV-2 infection per the analysis by Khoury *et al*<sup>15</sup>.

87

88 In summary, we report enhanced neutralization of Omicron BA.1 and BA.4/BA.5  
 89 following three doses of the NVX-CoV2373 vaccine with responses comparing well to  
 90 an mRNA vaccine. We note that six months after two doses of NVX-CoV2373,  
 91 increased binding antibodies were reported, and responses may mature further<sup>10</sup>. As  
 92 durability of vaccine platforms varies, future studies should assess this for NVX-  
 93 CoV2373 neutralization at later time-points<sup>9</sup>.

94

95

96

97

98

99

100

101

102

103

## 104 **Acknowledgments**

105 We thank Dr Thandeka Moyo-Gwete, Brent Oosthuysen, Donald Mhlanga, Frances  
106 Ayres, Haajira Kaldine, Nelia P. Manamela, Sebotsana Rasebotsa, Sharon  
107 Madzorera, Thanusha Naidoo, Thopisang Motlou for technical assistance in  
108 generating plasmids and / or proteins for this study.

109

## 110 **Author contributions**

111 Designed the study, performed analyses and wrote the manuscript: JNB, PLM

112 Performed experiments and analysed data: SIR, BEL, PK NM, HK,

113 Data curation and project management: CC

114 PIs for Sisonke (AD26CoV2.S) Trial: GG, LGB

115 Site PIs for Novavax Trial: AK, LFa, LFo, QB, KD, MT, MM,ZH, NS, SH, MA, CL, CG,

116 UL, NJ, GK

117 PIs for Novavax Trial: VS, CB, GMG SM

118

## 119 **Funding**

120 PLM is supported by the South African Research Chairs Initiative of the Department  
121 of Science and Innovation and National Research Foundation of South Africa, the SA  
122 Medical Research Council SHIP program, and the Centre for the AIDS Programme of  
123 Research in South Africa (CAPRISA). We acknowledge funding from the Bill and  
124 Melinda Gates Foundation, through the Global Immunology and Immune Sequencing  
125 for Epidemic Response (GIISER) program. The phase II clinical trial was funded by  
126 Novavax and the Bill and Melinda Gates Foundation. The findings and conclusions  
127 contained within are those of the authors and do not necessarily reflect positions or  
128 policies of the Bill and Melinda Gates Foundation.

129

## 130 **Methods**

131 *Samples and ethics approvals.*

132 Individuals vaccinated with two or three doses of the NVX-CoV2373 vaccine were  
133 sampled at 14 days after the second dose or 35 days after the third dose. This trial is  
134 registered under the ClinicalTrials.gov number, NCT04533399, and the protocol was  
135 approved by the South African Health Products Regulatory Authority and by the  
136 institutional review board at each trial centre as described in detail by Shinde and  
137 colleagues<sup>12</sup>. Health care workers vaccinated with two dose of AD26.COVID.2.S (5 x 10<sup>10</sup>  
138 viral particles) as part of the Sisonke implementation trial were sampled at 2 months  
139 after vaccination. This trial is registered under the ClinicalTrials.gov number,  
140 NCT05148845, and the protocol was approved by the South African Health Products  
141 Regulatory Authority. These Sisonke individuals were recruited at the National Institute  
142 for Communicable Diseases (NICD), Johannesburg. Individuals vaccinated with two  
143 and three doses of the BNT162b22 vaccine were sampled at 2 months after the  
144 second dose or 1-3 months after the third dose and were recruited from Johannesburg.  
145 This study was given ethics approval by the University of the Witwatersrand Human  
146 Research Ethics Committee (Medical) M210465. All individuals provided written  
147 informed consent.

148  
149  
150  
151  
152  
153  
154  
155  
156  
157  
158  
159  
160  
161  
162  
163  
164  
165  
166  
167  
168  
169  
170  
171  
172  
173  
174  
175  
176  
177  
178  
179  
180  
181  
182  
183  
184  
185  
186  
187  
188  
189  
190  
191

*Lentiviral pseudovirus production and neutralization assay.* The 293T/ACE2.MF cells modified to overexpress human ACE2 were kindly provided by M. Farzan (Scripps Research). Cells were cultured in DMEM (Gibco BRL Life Technologies) containing 10% heat-inactivated fetal bovine serum (FBS) and 3µgml<sup>-1</sup> puromycin at 37 °C, 5% CO<sub>2</sub>. Cell monolayers were disrupted at confluency by treatment with 0.25% trypsin in 1mM EDTA (Gibco BRL Life Technologies). The SARS-CoV-2, Wuhan-1 spike, cloned into pCDNA3.1 was mutated using the QuikChange Lightning Site-Directed Mutagenesis kit (Agilent Technologies) to include D614G (ancestral D164G) or L18F,D80A, D215G, Δ242-244, K417N, E484K, N501Y, D614G, A701V (Beta) or Δ69-70, T915I, Δ143-145, Δ211, L212I, ins 214 EPE, G339D, S371L, S373P, S375F, K417N, N440K, G446S, S477N, T478K, Q493R, G496S, Q498R, N501Y, Y505H, T547K, D614G, N679K, P681H, N764K, D796Y, N856K, Q954H, N969K, L981F (Omicron BA.1) or T19I, L24S, Δ25-27, Δ69-70, G142D, V213G, G339D, S371F, S373P, S375F, T376A, D405N, R408S, K417N, N440K, L452R, S477N, T478K, E484A, F486V, Q498R, N501Y, Y505H, D614G, H655Y, N679K, P681H, N764K, D796Y, Q954H, N969K (Omicron BA.4/BA.5). Pseudoviruses were produced by co-transfection with a lentiviral backbone (HIV-1 pNL4.luc encoding the firefly luciferase gene) and either of the SARS-CoV-2 spike plasmids with PEIMAX (Polysciences). Culture supernatants were clarified of cells by a 0.45-µM filter and stored at -80 °C. Plasma samples were heat-inactivated and clarified by centrifugation. Pseudovirus and serially diluted plasma/sera were incubated for 1h at 37 °C, 5% CO<sub>2</sub>. Cells were added at 1×10<sup>4</sup> cells per well after 72h of incubation at 37 °C, 5% CO<sub>2</sub>, luminescence was measured using PerkinElmer Life Sciences Model Victor X luminometer. Neutralization was measured as described by a reduction in luciferase gene expression after single-round infection of 293T/ACE2.MF cells with spike-pseudotyped viruses. Titers were calculated as the reciprocal plasma dilution (ID<sub>50</sub>) or monoclonal antibody concentration (IC<sub>50</sub>) causing 50% reduction of relative light units. Equivalency was established through participation in the SARS-CoV-2 Neutralizing Assay Concordance Survey Concordance Survey 1 run by EQAPOL and VQU, Duke Human Vaccine Institute. Cell-based neutralization assays using live virus or pseudovirus have demonstrated high concordance, with highly correlated 50% neutralization titers (Pearson r=0.81–0.89). Per Khoury and colleagues<sup>15</sup>, we used a threshold neutralization titer of 1 in 200, which is at 20.2% (**Fig 1**, dashed line) that of the convalescent plasma mean level (GMT: 993), estimated to provide a 50% level of protection from infection.



192  
193  
194  
195  
196  
197  
198  
199

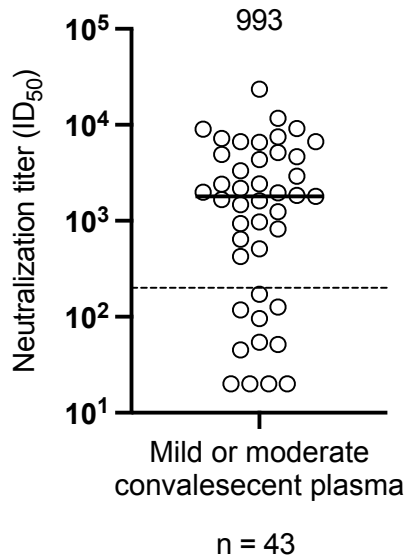

200  
201  
202  
203  
204  
205  
206  
207  
208  
209  
210  
211  
212  
213  
214  
215  
216  
217  
218  
219  
220  
221  
222

**Supplementary Figure 1. Neutralization of SARS-CoV-2 D614G by convalescent plasma.** Neutralization of ancestral D164G pseudoviruses by convalescent plasma collected during the study period of the NVX-CoV2373 trial in South Africa. Geometric mean titer (GMT) is shown above the individual points, and number of specimens tested are indicated. Dashed line indicates the neutralization level at 20,2% of the mean convalescent level, which provides an estimated 50% protection against detectable SARS-CoV-2 infection per the analysis by Khoury *et al*<sup>15</sup>.

223  
224  
225  
226  
227  
228  
229  
230  
231

**Supplementary Table 1. Vaccinee metadata**

| <b>Study ID</b> | <b>Age</b> | <b>Gender</b> | <b>Vaccine received</b> | <b>Days post last vaccine dose</b> | <b>Months post last vaccine dose</b> |
|-----------------|------------|---------------|-------------------------|------------------------------------|--------------------------------------|
| 939             | 50-59      | F             | AD26.COVS               | -                                  | 2                                    |
| 940             | 30-39      | F             | AD26.COVS               | -                                  | 2                                    |
| 945             | 30-39      | F             | AD26.COVS               | -                                  | 2                                    |
| 953             | 30-39      | F             | AD26.COVS               | -                                  | 2                                    |
| 952             | 20-29      | F             | AD26.COVS               | -                                  | 2                                    |
| 947             | 40-49      | F             | AD26.COVS               | -                                  | 2                                    |
| 950             | 30-39      | F             | AD26.COVS               | -                                  | 2                                    |
| 955             | 30-39      | F             | AD26.COVS               | -                                  | 2                                    |
| 956             | 20-29      | F             | AD26.COVS               | -                                  | 2                                    |
| 948             | 50-59      | F             | AD26.COVS               | -                                  | 2                                    |
| 930             | 60-69      | F             | BNT162b2                | -                                  | 2                                    |
| 931             | 60-69      | F             | BNT162b2                | -                                  | 2                                    |
| 936             | 70-79      | F             | BNT162b2                | -                                  | 2                                    |
| 933             | 70-79      | F             | BNT162b2                | -                                  | 2                                    |
| 928             | 70-79      | M             | BNT162b2                | -                                  | 2                                    |
| 929             | 70-79      | F             | BNT162b2                | -                                  | 2                                    |
| 932             | 60-69      | M             | BNT162b2                | -                                  | 2                                    |
| Pf_3_2          | 50-59      | F             | BNT162b2                | -                                  | 1                                    |
| Pf_3_3          | 30-39      | M             | BNT162b2                | -                                  | 1                                    |
| Pf_3_4          | 40-49      | F             | BNT162b2                | -                                  | 3                                    |
| Pf_3_1          | 40-49      | F             | BNT162b2                | -                                  | 3                                    |
| ZA0010017       | 20-29      | M             | NVX-CoV2373             | 35                                 | -                                    |
| ZA0010041       | 30-39      | M             | NVX-CoV2373             | 35                                 | -                                    |
| ZA0010042       | 30-39      | M             | NVX-CoV2373             | 35                                 | -                                    |
| ZA0010093       | 30-39      | M             | NVX-CoV2373             | 14 or 35                           | -                                    |
| ZA0010106       | 20-29      | F             | NVX-CoV2373             | 14 or 35                           | -                                    |
| ZA0010126       | 30-39      | F             | NVX-CoV2373             | 35                                 | -                                    |
| ZA0010170       | 40-49      | M             | NVX-CoV2373             | 35                                 | -                                    |
| ZA0010258       | 30-39      | M             | NVX-CoV2373             | 35                                 | -                                    |
| ZA0010263       | 30-39      | F             | NVX-CoV2373             | 35                                 | -                                    |
| ZA0010325       | 30-39      | F             | NVX-CoV2373             | 14 or 35                           | -                                    |

|           |       |   |             |          |   |
|-----------|-------|---|-------------|----------|---|
| ZA0010331 | 20-29 | M | NVX-CoV2373 | 35       | - |
| ZA0010332 | 30-39 | M | NVX-CoV2373 | 35       | - |
| ZA0010337 | 20-29 | F | NVX-CoV2373 | 14 or 35 | - |
| ZA0010340 | 20-29 | M | NVX-CoV2373 | 14 or 35 | - |
| ZA0010351 | 50-59 | F | NVX-CoV2373 | 14 or 35 | - |
| ZA0010358 | 30-39 | F | NVX-CoV2373 | 14 or 35 | - |
| ZA0010424 | 30-39 | F | NVX-CoV2373 | 14 or 35 | - |
| ZA0010440 | 20-29 | F | NVX-CoV2373 | 35       | - |
| ZA0010452 | 30-39 | M | NVX-CoV2373 | 35       | - |
| ZA0010469 | 30-39 | M | NVX-CoV2373 | 14 or 35 | - |
| ZA0010516 | 30-39 | F | NVX-CoV2373 | 35       | - |
| ZA0010549 | 30-39 | M | NVX-CoV2373 | 35       | - |
| ZA0010557 | 20-29 | F | NVX-CoV2373 | 35       | - |
| ZA0010577 | 18-19 | F | NVX-CoV2373 | 35       | - |
| ZA0010611 | 40-49 | F | NVX-CoV2373 | 35       | - |
| ZA0010615 | 20-29 | F | NVX-CoV2373 | 35       | - |
| ZA0010636 | 20-29 | F | NVX-CoV2373 | 35       | - |
| ZA0010644 | 30-39 | F | NVX-CoV2373 | 35       | - |
| ZA0010656 | 20-29 | M | NVX-CoV2373 | 35       | - |
| ZA0030061 | 20-29 | M | NVX-CoV2374 | 14 or 35 | - |
| ZA0030077 | 30-39 | M | NVX-CoV2375 | 14 or 35 | - |
| ZA0030117 | 40-49 | M | NVX-CoV2376 | 14 or 35 | - |
| ZA0030118 | 30-39 | M | NVX-CoV2377 | 14 or 35 | - |
| ZA0030138 | 30-39 | M | NVX-CoV2378 | 14 or 35 | - |
| ZA0030187 | 20-29 | M | NVX-CoV2379 | 14 or 35 | - |
| ZA0030199 | 30-39 | M | NVX-CoV2380 | 14 or 35 | - |
| ZA0030204 | 20-29 | F | NVX-CoV2381 | 14 or 35 | - |
| ZA0120014 | 20-29 | M | NVX-CoV2382 | 14 or 35 | - |
| ZA0120048 | 30-39 | M | NVX-CoV2383 | 14 or 35 | - |
| ZA0150166 | 18-19 | M | NVX-CoV2384 | 14 or 35 | - |
| ZA0150234 | 18-19 | M | NVX-CoV2385 | 14 or 35 | - |
| ZA0150252 | 20-29 | M | NVX-CoV2386 | 14 or 35 | - |
| ZA0150327 | 20-29 | M | NVX-CoV2387 | 14 or 35 | - |
| ZA0180009 | 50-59 | F | NVX-CoV2388 | 14 or 35 | - |
| ZA0180024 | 20-29 | M | NVX-CoV2389 | 35       | - |
| ZA0180058 | 20-29 | M | NVX-CoV2390 | 14 or 35 | - |
| ZA0180080 | 20-29 | F | NVX-CoV2391 | 35       | - |
| ZA0180081 | 30-39 | M | NVX-CoV2392 | 14 or 35 | - |
| ZA0180128 | 18-19 | M | NVX-CoV2393 | 35       | - |
| ZA0180138 | 20-29 | M | NVX-CoV2394 | 14 or 35 | - |
| ZA0180224 | 18-19 | M | NVX-CoV2395 | 14 or 35 | - |
| ZA0180293 | 20-29 | M | NVX-CoV2396 | 35       | - |

|           |       |   |             |          |   |
|-----------|-------|---|-------------|----------|---|
| ZA0180306 | 20-29 | F | NVX-CoV2397 | 35       | - |
| ZA0180371 | 20-29 | M | NVX-CoV2398 | 35       | - |
| ZA0180424 | 18-19 | M | NVX-CoV2399 | 35       | - |
| ZA0180434 | 20-29 | F | NVX-CoV2400 | 35       | - |
| ZA0180481 | 20-29 | F | NVX-CoV2401 | 35       | - |
| ZA0180513 | 20-29 | M | NVX-CoV2402 | 35       | - |
| ZA0180518 | 40-49 | F | NVX-CoV2403 | 35       | - |
| ZA0180529 | 20-29 | M | NVX-CoV2404 | 35       | - |
| ZA0180532 | 30-39 | M | NVX-CoV2405 | 35       | - |
| ZA0180589 | 30-39 | F | NVX-CoV2406 | 35       | - |
| ZA0180611 | 20-29 | M | NVX-CoV2407 | 35       | - |
| ZA0180690 | 20-29 | F | NVX-CoV2408 | 35       | - |
| ZA0200005 | 20-29 | M | NVX-CoV2409 | 35       | - |
| ZA0200040 | 20-29 | M | NVX-CoV2410 | 35       | - |
| ZA0200044 | 20-29 | M | NVX-CoV2411 | 14 or 35 | - |
| ZA0200055 | 30-39 | F | NVX-CoV2412 | 35       | - |
| ZA0200062 | 30-39 | M | NVX-CoV2413 | 35       | - |
| ZA0200118 | 20-29 | F | NVX-CoV2414 | 35       | - |
| ZA0200125 | 20-29 | M | NVX-CoV2415 | 35       | - |
| ZA0210015 | 20-29 | F | NVX-CoV2416 | 35       | - |
| ZA0210206 | 30-39 | F | NVX-CoV2417 | 35       | - |
| ZA0210380 | 20-29 | F | NVX-CoV2418 | 35       | - |

232

233

234

## References

1. Viana, R., *et al.* Rapid epidemic expansion of the SARS-CoV-2 Omicron variant in southern Africa. *Nature* **603**, 679-686 (2022).
2. Rambaut, A., *et al.* A dynamic nomenclature proposal for SARS-CoV-2 lineages to assist genomic epidemiology. *Nat Microbiol* **5**, 1403-1407 (2020).
3. Cele, S., *et al.* Omicron extensively but incompletely escapes Pfizer BNT162b2 neutralization. *Nature* **602**, 654-656 (2022).
4. Garcia-Beltran, W.F., *et al.* mRNA-based COVID-19 vaccine boosters induce neutralizing immunity against SARS-CoV-2 Omicron variant. *Cell* **185**, 457-466 e454 (2022).
5. Richardson, S.I., *et al.* SARS-CoV-2 Omicron triggers cross-reactive neutralization and Fc effector functions in previously vaccinated, but not unvaccinated, individuals. *Cell Host Microbe* **30**, 880-886 e884 (2022).
6. Zhang, Z., *et al.* Humoral and cellular immune memory to four COVID-19 vaccines. *Cell* (2022).
7. Bowen, J.E., *et al.* Omicron BA.1 and BA.2 neutralizing activity elicited by a comprehensive panel of human vaccines. *bioRxiv*, 2022.2003.2015.484542 (2022).
8. Cao, Y., *et al.* BA.2.12.1, BA.4 and BA.5 escape antibodies elicited by Omicron infection. *bioRxiv*, 2022.2004.2030.489997 (2022).
9. Mallory, R., *et al.* Immunogenicity and Safety Following a Homologous Booster Dose of a SARS-CoV-2 recombinant spike protein vaccine (NVX-CoV2373): A Phase 2 Randomized Placebo-Controlled Trial. *medRxiv*, 2021.2012.2023.21267374 (2021).
10. Heath, P.T., *et al.* Safety and Efficacy of NVX-CoV2373 Covid-19 Vaccine. *N Engl J Med* **385**, 1172-1183 (2021).
11. Dunkle, L.M., *et al.* Efficacy and Safety of NVX-CoV2373 in Adults in the United States and Mexico. *N Engl J Med* **386**, 531-543 (2022).
12. Shinde, V., *et al.* Efficacy of NVX-CoV2373 Covid-19 Vaccine against the B.1.351 Variant. *N Engl J Med* **384**, 1899-1909 (2021).
13. Organization, W.H. WHO lists 9th COVID-19 vaccine for emergency use with aim to increase access to vaccination in lower-income countries. Vol. 2022 (2021).
14. Agency, E.M. Nuvaxovid. Vol. 2022 (2021).

15. Khoury, D.S., *et al.* Neutralizing antibody levels are highly predictive of immune protection from symptomatic SARS-CoV-2 infection. *Nat Med* **27**, 1205-1211 (2021).
